# Supplementary material
Source: PubMed Central journal article supplement (PMC4508496)
Supplement: thnov05p1058s1.pdf [file thnov05p1058s1.pdf]

## Supplementary Materials

# Enzyme-Controlled Intracellular Self-Assembly of $^{18}\text{F}$ Nanoparticles for Enhanced MicroPET Imaging of Tumor

Yaling Liu,<sup>†1,3</sup> Qingqing Miao,<sup>‡2</sup> Pei Zou,<sup>3</sup> Longfei Liu,<sup>2</sup> Xiaojing Wang,<sup>2</sup> Linna An,<sup>2</sup> Xiaoliu Zhang,<sup>2</sup> Xiangping Qian,<sup>4</sup> Shineng Luo,<sup>\*1,3</sup> and Gaolin Liang<sup>\*2</sup>

1. School of Chemical and Material Engineering, Jiangnan University, 1800 Lihu Road, Wuxi, Jiangsu 214122, China
2. CAS Key Laboratory of Soft Matter Chemistry, Department of Chemistry, University of Science and Technology of China, Hefei, Anhui 230026, China
3. Key Laboratory of Nuclear Medicine, Ministry of Health, Jiangsu Key Laboratory of Molecular Nuclear Medicine, Jiangsu Institute of Nuclear Medicine, Wuxi, Jiangsu 214063, China
4. College of Pharmaceutical Sciences, Soochow University, Suzhou, Jiangsu 215123, China

E-mail: luoshn163@163.com (S.-N. L.), gliang@ustc.edu.cn (G.-L. L.).

## Contents:

1. Chemical syntheses and characterizations of **2**, SFB, **1-Cold**,  $^{18}\text{F}$ -SFB, and **1**
2. Supplementary figures and tables
3. References

## 1. Chemical syntheses and characterizations of **2**, SFB, **1-Cold**, $^{18}\text{F}$ -SFB, and **1**

The preparations of compound **2**, N-succinimidyl- 4-fluorobenzoate (SFB), **1-Cold**,  $^{18}\text{F}$ -SFB, and **1** were described as below; 2-cyano-6-aminobenzothiazole (**CBT**) was synthesized following the literature method.<sup>1</sup>

*Preparation of Acetyl-Arg-Val-Arg-Arg-Cys(StBu)-Lys-CBT (2).*

*Scheme S1.* Synthetic route for compound **2**.

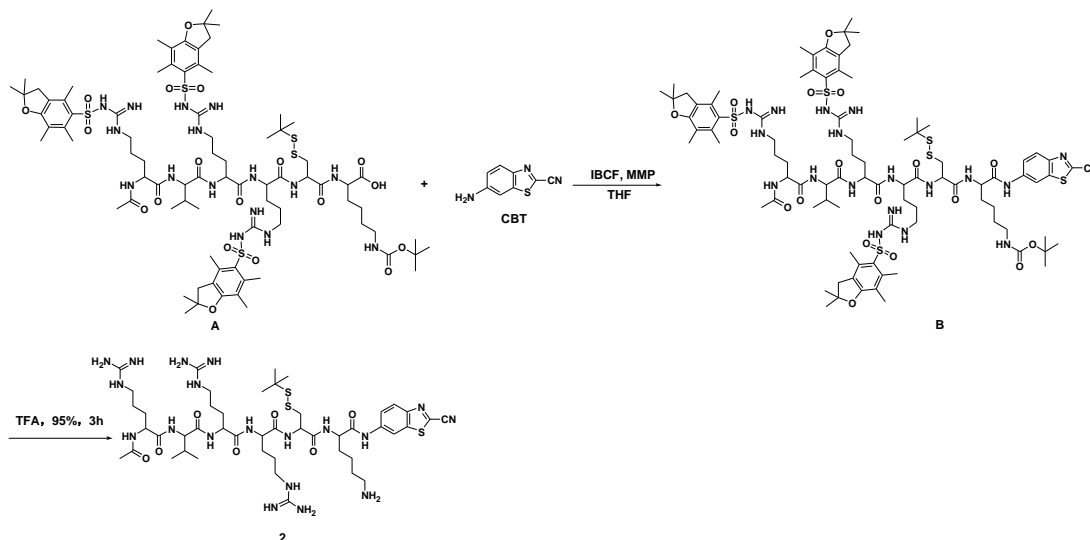

Peptide Ac-Arg-Val-Arg-Arg-Cys(StBu)-Lys-OH (**A**, 180 mg, 0.1 mmol) was prepared by solid phase peptide synthesis (SPPS). The isobutyl chloroformate (8.7  $\mu\text{L}$ , 0.12 mmol) was added to a mixture of **A** (180 mg, 0.1 mmol) and MMP (4-methylmorpholine, 8.5  $\mu\text{L}$ , 0.15 mmol) in THF (1.5 mL) at 0 °C under  $\text{N}_2$  and the reaction mixture was stirred for 20 min. The solution of

2-cyano-6-aminobenzothiazole (CBT) (18 mg, 0.1 mmol) was added to the reaction mixture and further stirred for 1 h at 0 °C then overnight at room temperature. The pure product **B** (68 mg, 35%) was obtained after HPLC purification. The Boc and Pbf protecting groups were cleaved with 95% TFA in CH<sub>2</sub>Cl<sub>2</sub> for 3 hrs in the presence of 1% triisopropylsilane. The pure product **2** (20 mg, 50%) was obtained after HPLC purification. <sup>1</sup>H NMR of compound **2** (*d*<sub>4</sub>-CH<sub>3</sub>OH, 400 MHz, δ, ppm) (Fig. S1): 8.68 (s, 1 H), 8.12 (d, J = 9.0 Hz, 1 H), 7.79 (d, J = 9.0 Hz, 1 H), 4.56-4.65 (m, 1 H), 4.46-4.54 (m, 1 H), 4.20-4.37 (m, 3 H), 4.08 (d, J = 7.4 Hz, 1 H), 3.04-3.26 (m, 9 H), 2.93 (t, 2 H), 2.03 (s, 3 H), 1.45-1.99 (br, 18 H), 1.31 (s, 9 H), 0.97 (t, 6 H); <sup>13</sup>C NMR of compound **2** (*d*<sub>4</sub>-CH<sub>3</sub>OH, 100 MHz, δ, ppm) (Fig. S2): 175.01, 174.69, 174.60, 174.42, 174.19, 172.73, 172.50, 158.73, 158.68, 150.01, 140.46, 138.02, 136.88, 125.98, 122.56, 119.37, 113.04, 61.49, 58.37, 55.76, 55.70, 55.35, 55.29, 55.00, 42.62, 42.03, 41.97, 40.56, 32.19, 31.32, 30.27, 29.65, 29.59, 28.07, 26.44, 26.41, 23.93, 22.60, 19.75, 19.26, 18.34; MS of **2**: calculated for C<sub>46</sub>H<sub>77</sub>N<sub>19</sub>O<sub>7</sub>S<sub>3</sub>, [(M+H)<sup>+</sup>]: 1104.54; obsvd. ESI-MS: m/z 1104.72.

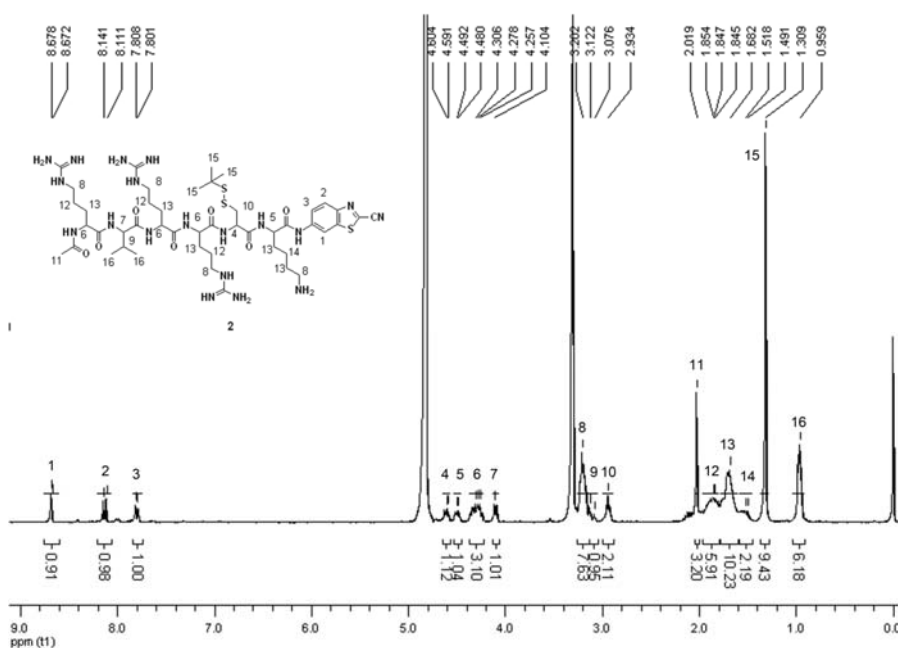

**Figure S1.** <sup>1</sup>H NMR spectrum of compound **2**.

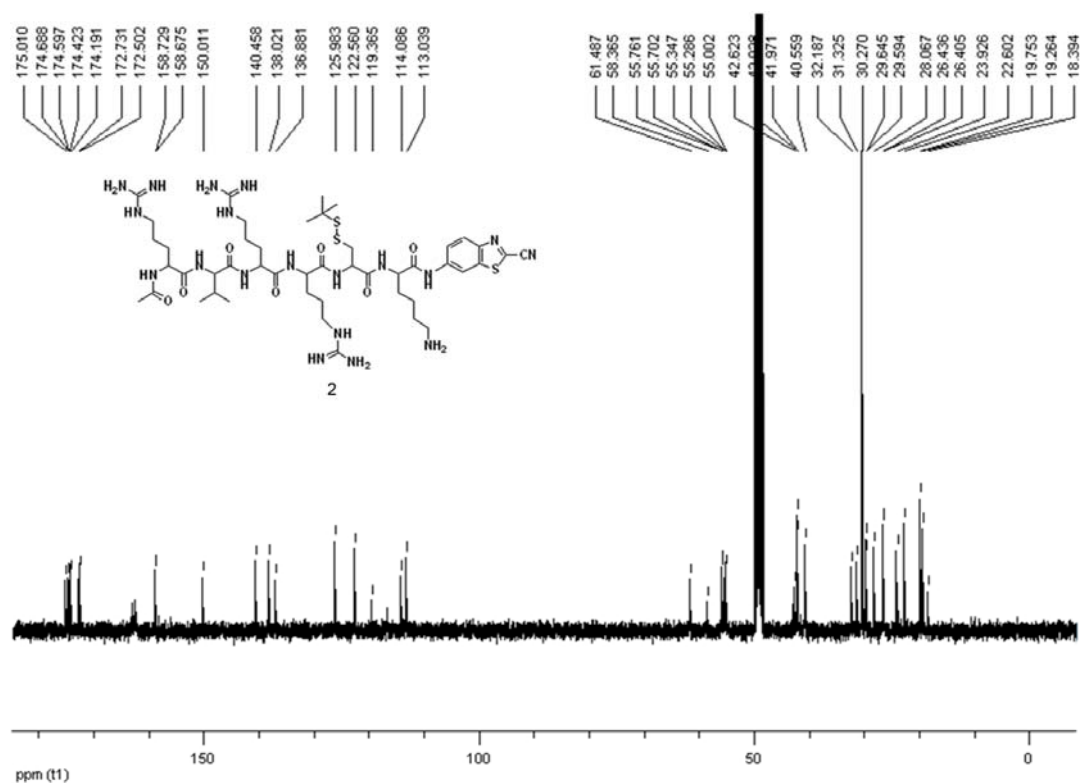

**Figure S2.** <sup>13</sup>C NMR spectrum of compound **2**.

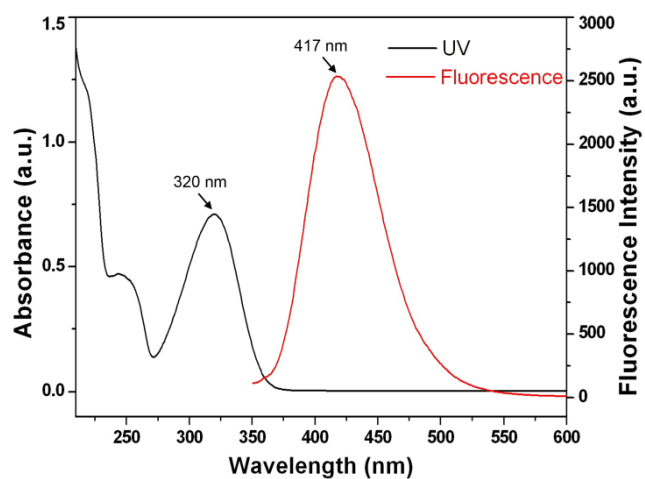

**Figure S3.** UV-vis spectrum (black), and fluorescence emission spectrum (red) of **2** in distilled water, respectively.

*Preparation of Acetyl-Arg-Val-Arg-Arg-Cys(StBu)-Lys(FB)-CBT (1-Cold).*

**Scheme S2.** Synthetic route for **1-Cold**.

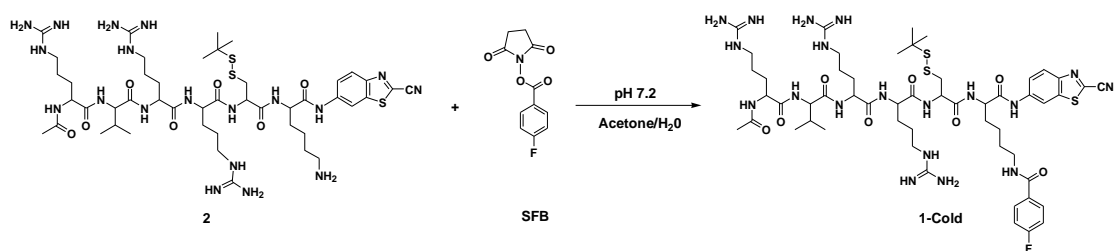

**Synthesis of N-succinimidyl- 4-fluorobenzoate (SFB):**

4-fluorobenzoic acid (1.40 g, 10 mmol) was mixed with N-hydroxysuccinimide (1.38 g, 12 mmol), then 30 mL of chloroform was added to obtain a well-dispersed solution. After N,N'-Dicyclohexylcarbodiimide (2.47 g, 12 mmol) was added into the mixture, the solution was stirred overnight at room temperature. The chloroform was evaporated and the N-succinimidyl 4-fluorobenzoate was purified by chromatography with ethyl acetate-petroleum ether (1:2) as the eluent to yield 1.92 g (80%) of white solid. <sup>1</sup>H NMR (CDCl<sub>3</sub>, 300 MHz,  $\delta$ , ppm) (Fig. S4): 8.16 (m, 2 H), 7.19 (m, 2 H), 2.89 (s, 4 H).

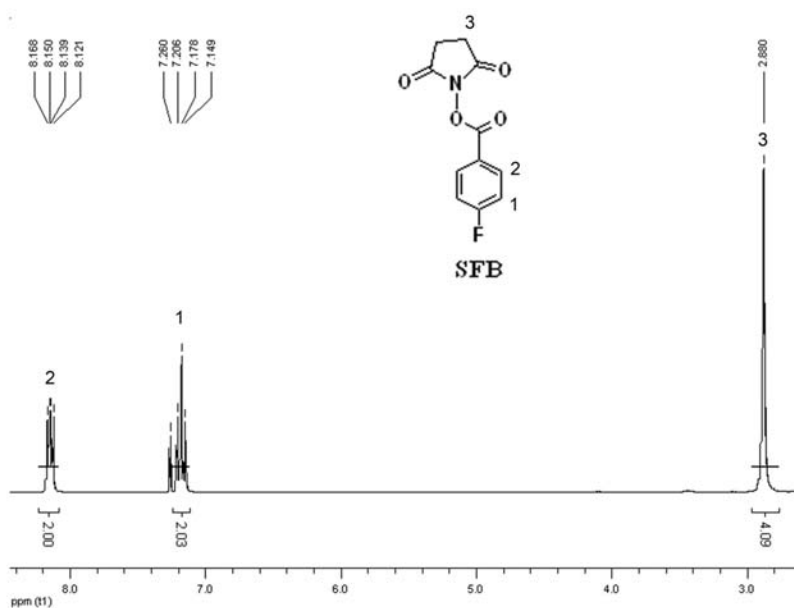

**Figure S4.** <sup>1</sup>H NMR spectrum of SFB.

### Synthesis of **1-Cold**:

Compound **2** (20 mg, 0.018mmol) was dissolved in 5 mL of water, and the pH of the solution was adjusted to 8.5 with sodium carbonate. N-succinimidyl 4-fluorobenzoate (25 mg, 0.11 mmol) was dissolved in 10 mL of acetone, and then added into the water solution dropwise. The ratio of water/acetone was adjusted to keep the reaction mixture clear. The mixture was stirred at room temperature for 6 hrs. The reaction mixture was subjected to HPLC purification to yield pure compound **1-Cold** (15 mg, 0.012 mmol, 67%). The method was referred from the literature.<sup>2</sup> <sup>1</sup>H NMR of compound **1-Cold** (d<sub>4</sub>-CH<sub>3</sub>OH, 300 MHz,  $\delta$ , ppm) (Fig. S5): 8.63 (s, 1 H), 8.10 (d, J = 9.0 Hz, 1 H), 7.70-7.85 (m, 3 H), 7.11 (t, 2 H), 4.57-4.67 (m, 1 H), 4.44-4.53 (m, 1 H), 4.24-4.38 (m, 3 H), 4.12 (d, J = 7.1 Hz, 1 H), 3.33-3.43 (m, 2 H), 3.01-3.24 (br, 9 H), 2.01(s, 3 H), 1.42-1.96 (br, 18 H), 1.30 (s, 9 H), 0.94 (d, 6 H). MS of **1-Cold**: calculated for C<sub>53</sub>H<sub>80</sub>FN<sub>19</sub>O<sub>8</sub>S<sub>3</sub>[(M+H)<sup>+</sup>]: 1226.56; obsvd. Maldi-MS: m/z 1226.56.

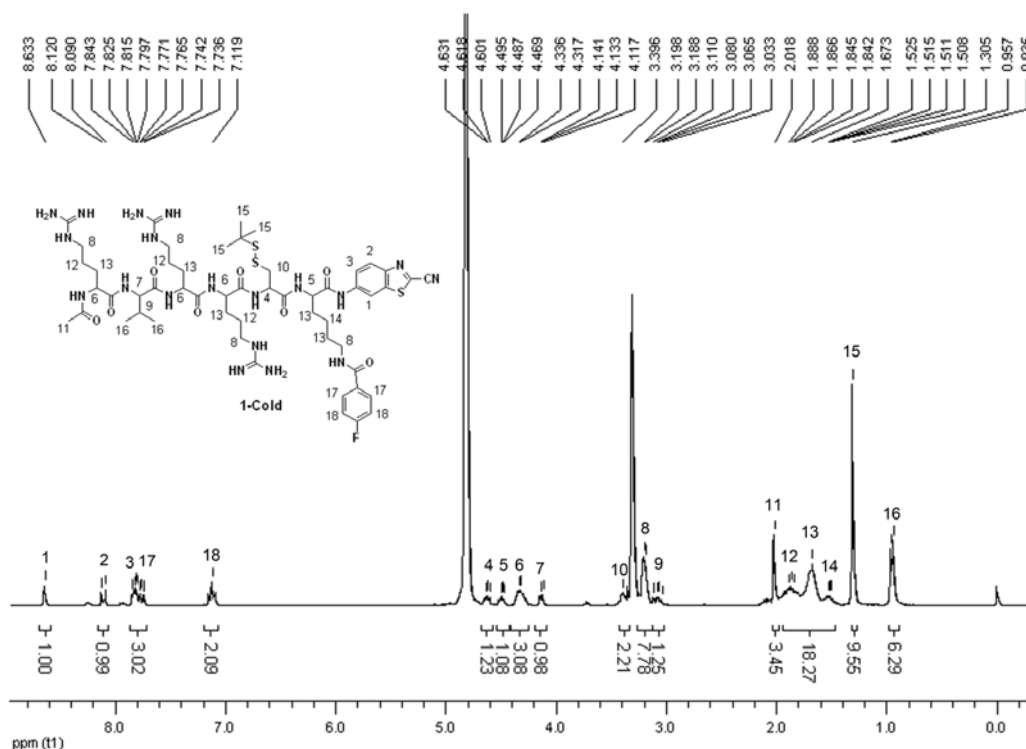

**Figure S5.** <sup>1</sup>H NMR spectrum of compound **1-Cold**.

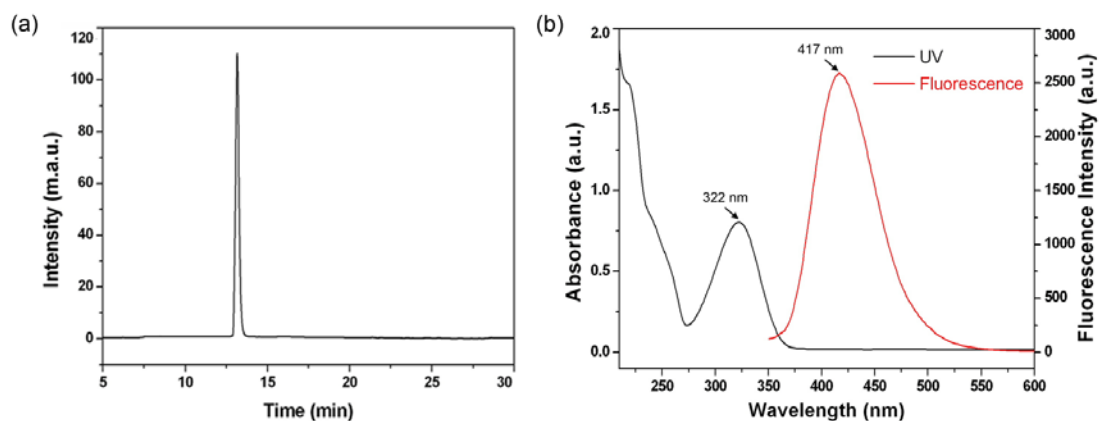

**Figure S6.** HPLC trace (a) and UV-vis spectrum (black) and fluorescence emission spectrum (red) (b) of **1-Cold** in distilled water, respectively.

*Preparation of Acetyl-Arg-Val-Arg-Arg-Cys(StBu)-Lys(<sup>18</sup>F-FB)-CBT (**1**).*

**Scheme S3.** Synthetic route for **1**.

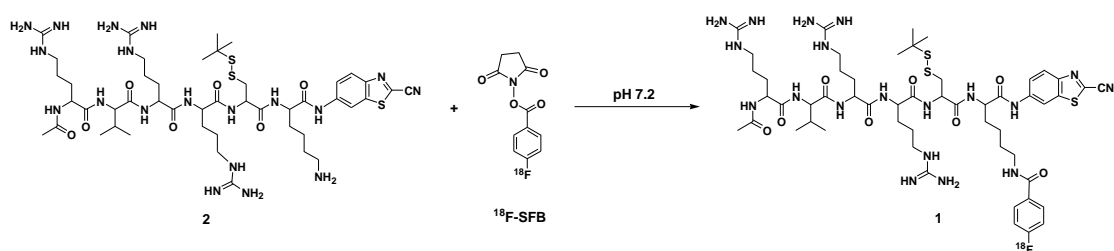

**Radiosynthesis of <sup>18</sup>F-SFB.** [<sup>18</sup>F]-fluoride(1000 mCi) was prepared by proton bombardment of 2.5 mL [<sup>18</sup>O] enriched water target via the <sup>18</sup>O (p,n) <sup>18</sup>F nuclear reaction. The [<sup>18</sup>F]-fluoride produced from cyclotron was then trapped onto a Sep-Pak QMA cartridge. The [<sup>18</sup>F]fluoride was then released into tube 1 from the cartridge by using the K<sub>222</sub>(4,7,13,16,21,24-hexaoxa-1,10-diazabicyclo [8.8.8] hexacosane) (15.0 mg/mL) / K<sub>2</sub>CO<sub>3</sub> solution (2.75 mg/mL) (1.5 mL, 10:1 CH<sub>3</sub>CN/H<sub>2</sub>O). After solvent evaporated to dryness under a stream of N<sub>2</sub> at 120 °C, the azeotropic drying was repeated once with 1.2 mL of CH<sub>3</sub>CN to yield the anhydrous K<sub>222</sub>/K[<sup>18</sup>F]F complex. After ethyl 4-(trimethylammonium) benzoate trifluoromethane sulfonate (10 mg) solution (CH<sub>3</sub>CN) was transferred into tube 1, the mixture was heated at 90 °C for 12 min to produce ethyl 4-[<sup>18</sup>F]

fluorobenzoate. The NaOH solution (0.5 M, 0.5 mL) was added after cooling and then heated at 90 °C for 6 min. The mixture of solution (1.5 mL, 0.1 M HCl, 7.5 mL CH<sub>3</sub>CN) was added to neutralize and then trapped in the C18 Sep-Pak cartridge. The cartridge was eluted with CH<sub>3</sub>CN and collected into tube 2 added with TPAOH (40 µL). Then the mixture was dried at 100 °C, subsequently, TSTU (O-(N-succinimidyl)-N,N,N',N'-tetramethyl uronium Tetrafluoroborate) (15 mg) dissolved in CH<sub>3</sub>CN (2 mL) was added to the reaction mixture and then the mixture was heated at 90 °C for 6 min to afford <sup>18</sup>F-SFB. After acidifying with 1.5 mL of HCl (0.1 M), the final solution was passed through a C18 Sep-Pak cartridge and the crude <sup>18</sup>F-SFB was eluted with 2 mL of CH<sub>3</sub>CN. The radiochemical yield (RCY) (decay-corrected to the end of synthesis) of <sup>18</sup>F-SFB is 40% with radiochemical purity above 90% analyzed by radio-HPLC and radio-TLC analysis. Figure S7 shows that the retention time of <sup>18</sup>F-SFB (red line) is corresponding to that of SFB (black line).

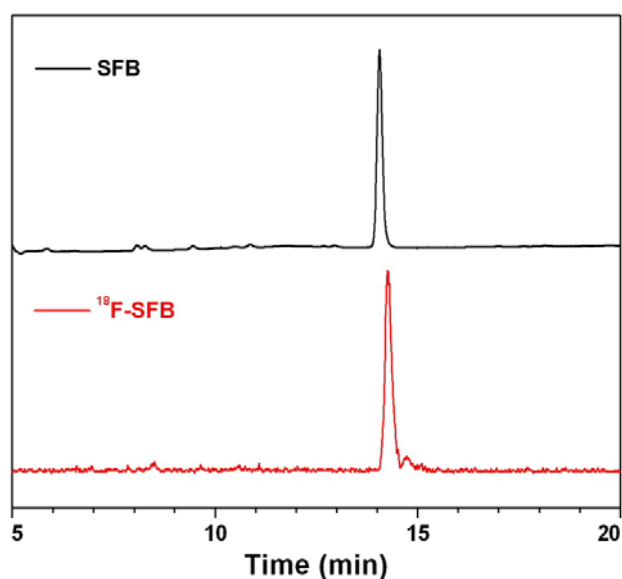

**Figure S7.** Radio-HPLC traces of **SFB** (black, absorbance at 254 nm) and **<sup>18</sup>F-SFB** (red, radiochromatograph).

### Synthesis of **1**:

$^{18}\text{F}$ -SFB (20  $\mu\text{L}$ , 5 mCi) was added into the 150  $\mu\text{L}$  solution of **2** (100  $\mu\text{g}$ , 90 nmol) dissolved in phosphate buffered saline (PBS) at pH 7.2, heated at 50  $^{\circ}\text{C}$  for 0.5 h. Then the reaction mixture was injected into the radio-HPLC for purification and analysis. the HPLC peak at 15.9 min on the raio-HPLC trace, which has a same retention time of that of **1-Cold**, was collected and dried at 100  $^{\circ}\text{C}$  by  $\text{N}_2$  to remove the acetonitrile as **1** with 50% radiochemical yield (RCY) (decay-corrected to the end of synthesis, EOS) and specific radioactivity of  $0.6 \pm 0.4 \text{ Ci } \mu\text{mol}^{-1}$  (EOS) (Figure S8).

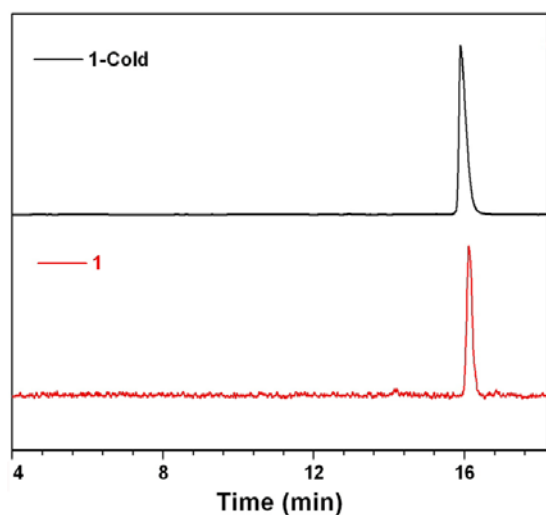

**Figure S8.** Radio-HPLC traces of **1-Cold** (black, absorbance at 320 nm) and **1** (red, radiochromatograph).

## 2. Supplementary figures and tables

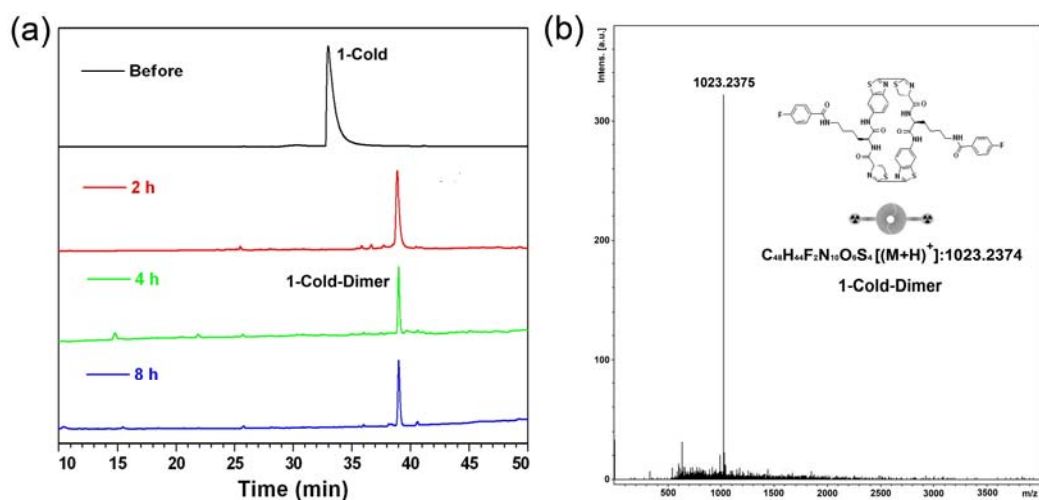

**Figure S9.** (a) HPLC traces of the incubation mixture of **1-Cold** at 100  $\mu\text{M}$  after 2 h (red), 4 h (green), 8 h (blue) incubation with 1 nmol/U of furin at 37  $^{\circ}\text{C}$ , and HPLC trace of **1-Cold** in water (black). (b) High resolution MALDI mass spectrum of HPLC peak at 38.9 min in figure a.

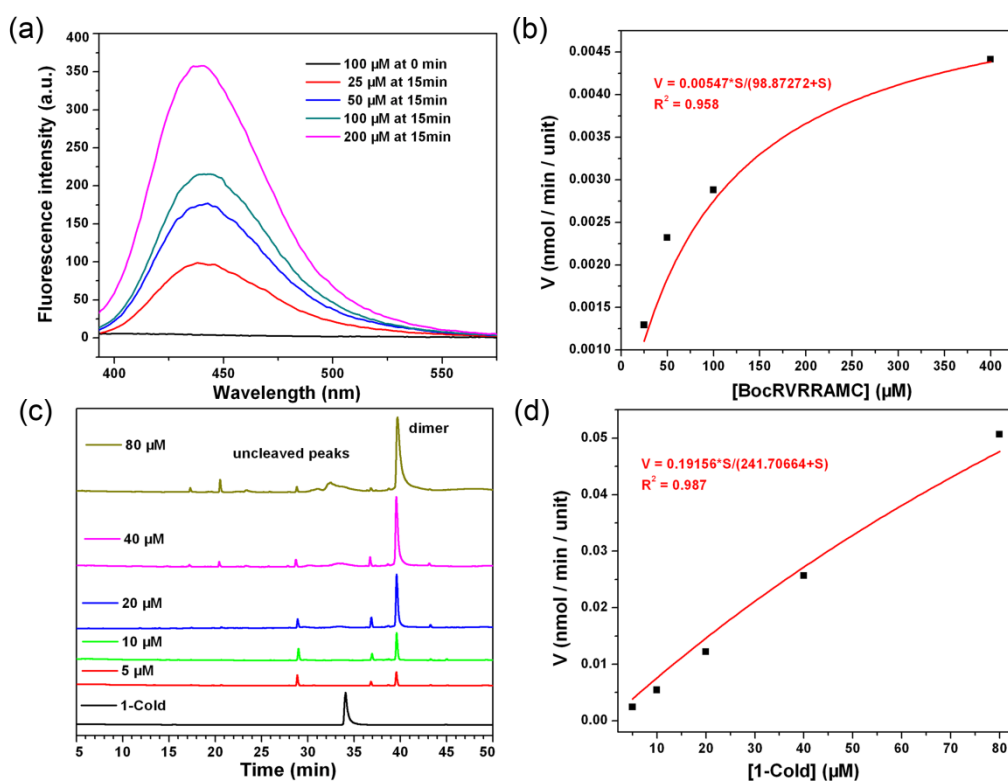

**Figure S10.** (a) Fluorescence spectra of Boc-Arg-Val-Arg-Arg-AMC at different concentrations

after 15 min incubation with furin (10 unit/100  $\mu$ L) at 37  $^{\circ}$ C and fluorescence spectrum of Boc-Arg-Val-Arg-Arg-AMC at 100  $\mu$ M without furin (black). Excitation: 370 nm. (b) Non-linear regression analysis of furin cleavage rate  $V$  (nmol/min/unit) as a function of Boc-Arg-Val-Arg-Arg-AMC concentration to give formula:  $V = 0.00547 \cdot S / (98.87272 + S)$ .  $[S]$  = concentration of substrate used. The  $K_M$  (99  $\mu$ M) and  $V_{max}$  (0.00547 nmol/min/unit) were obtained from the formula above. (c) HPLC traces of the incubation mixture of **1-Cold** at different concentrations after 15 min incubation with furin (10 unit/100  $\mu$ L) at 37  $^{\circ}$ C, and HPLC trace of **1-Cold** in water (black). Absorbance: 320 nm. (d) Non-linear regression analysis of furin cleavage rate  $V$  (nmol/min/unit) as a function of **1-Cold** concentration to give formula:  $V = 0.19156 \cdot S / (241.70664 + S)$ .  $[S]$  = concentration of substrate used. The  $K_M$  (242  $\mu$ M) and  $V_{max}$  (0.19156 nmol/min/unit) were obtained from the formula above.

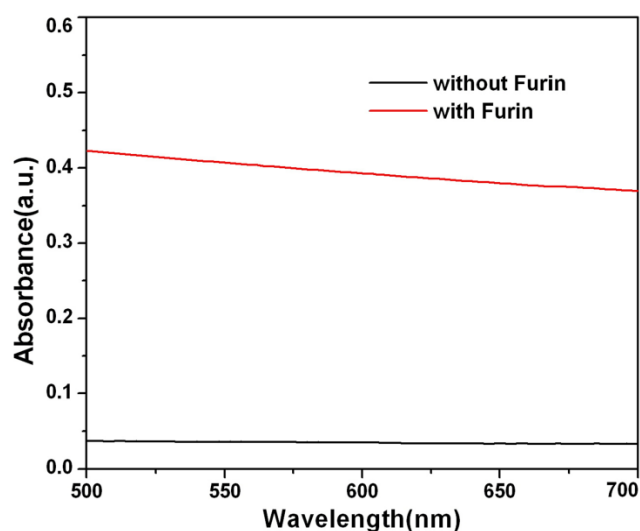

**Figure S11.** Absorption spectra (500-700 nm due to the light scattering) of **1-Cold** at 100  $\mu$ M without furin (black) or incubated with furin at 1 nmol/U, pH 7.4, and 37  $^{\circ}$ C for 4 h (red).

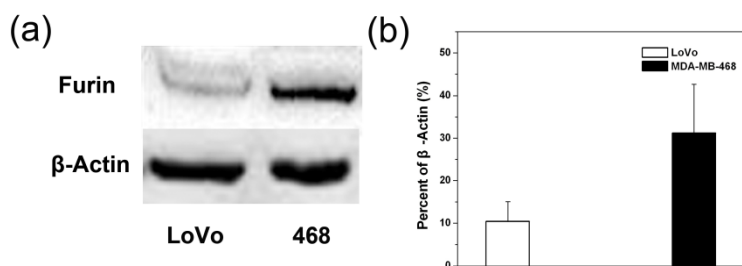

**Figure S12.** Western blot analysis (a) and quantification (b) of furin in human breast cancer MDA-MB-468 cells and human colon carcinoma LoVo cells.

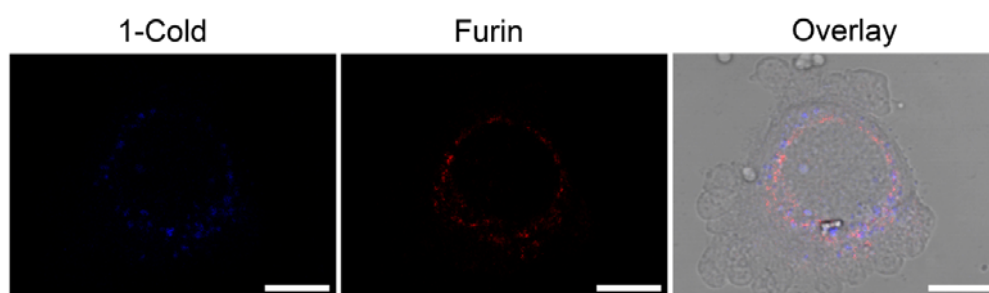

**Figure S13.** Left, Confocal fluorescence image ( $\lambda_{\text{ex}} = 405$  nm,  $\lambda_{\text{em}} = 414\text{-}530$  nm) of MDA-MB-468 cells incubated with **1-Cold** at 100  $\mu$ M and 37  $^{\circ}$ C for 1 h. Middle, Immunostaining of MDA-MB-468 cells with rhodamine-labeled antibody against furin after incubation with **1-Cold** at 100  $\mu$ M and 37  $^{\circ}$ C for 1 h ( $\lambda_{\text{ex}} = 543$  nm,  $\lambda_{\text{em}} = 554\text{-}683$  nm). Right, An overlay of the fluorescence images with the white field image of MDA-MB-468 cells. Scale bar: 10  $\mu$ m.

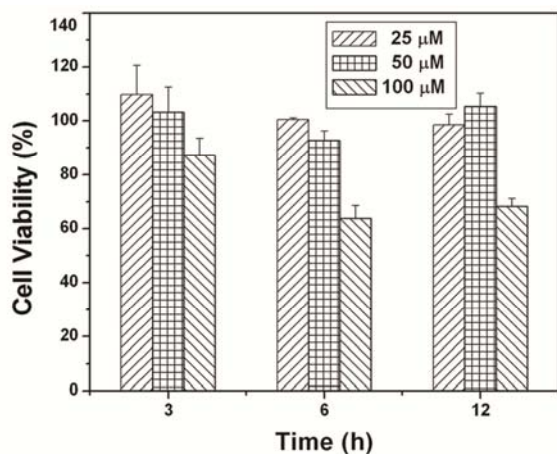

**Figure S14.** MTT assay of **1-Cold** on MDA-MB-468 cells. Cell viability values (%) estimated by

MTT proliferation test at concentrations of 25, 50 and 100  $\mu\text{M}$  of **1-Cold**. MDA-MB-468 cells were cultured in the presence of **1-Cold** for 3, 6 and 12 h at 37 °C under 5% CO<sub>2</sub>. These experiments were performed in triplicate. Results are representative of three independent experiments. Error bars represent standard deviations.

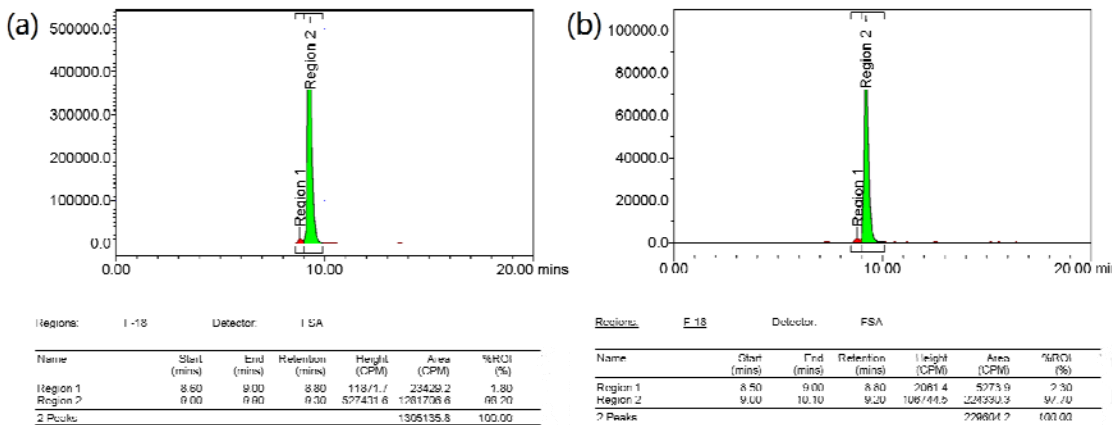

**Figure S15.** HPLC traces of **1** (a, radiochromatograph) and **1** incubated with fetal bovine serum at 37 °C for 5 hours (b, radiochromatograph), respectively.

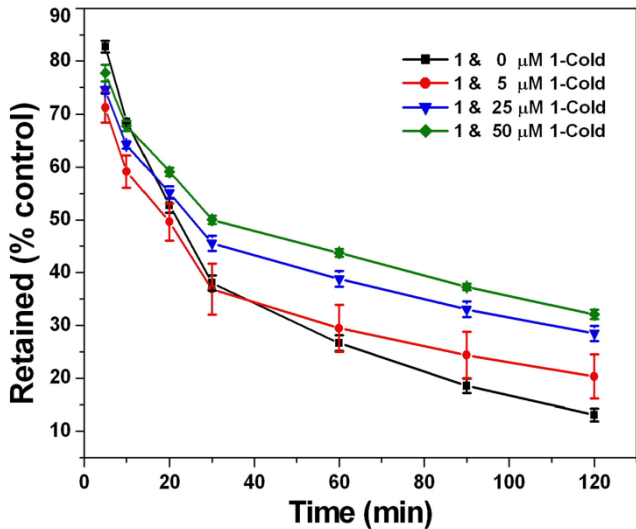

**Figure S16.** Concentration-dependent intracellular self-assembly: Time course of cellular efflux of **1** after 60 min incubation with 1 million MDA-MB-468 cells at 4  $\mu\text{Ci}$  and co-incubated with **1-Cold** at

different concentrations.

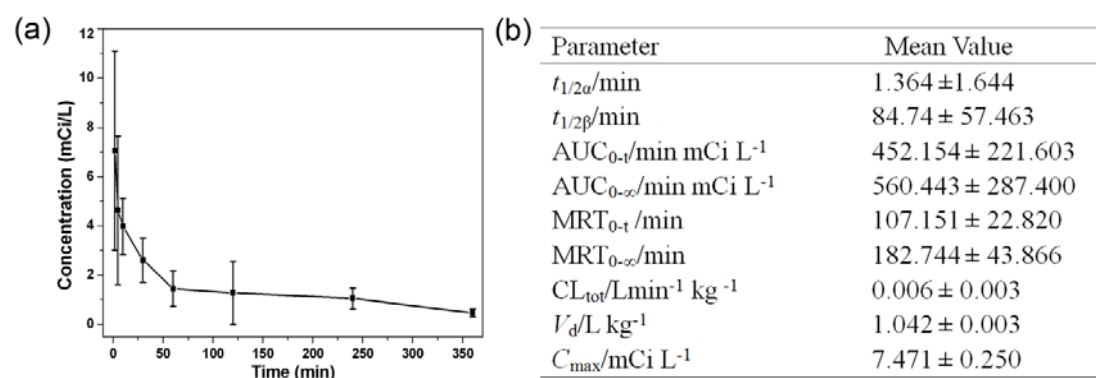

**Figure S17.** (a) Profiles of mean plasma concentration of **1** vs. time after i.v. administration of 3.0 mCi/kg of **1** to mice. (b) Mean values of the pharmacokinetic parameters of **1** after i.v. administration of 3.0 mCi/kg of **1** to mice (n = 5).

**Table S1.** HPLC condition for the purification of compounds **2** and **1-Cold**.

| Time (minute) | Flow (mL/min.) | H <sub>2</sub> O % (0.1%TFA) | CH <sub>3</sub> CN% (0.1%TFA) |
|---------------|----------------|------------------------------|-------------------------------|
| 0             | 3.0            | 30                           | 70                            |
| 3             | 3.0            | 30                           | 70                            |
| 35            | 3.0            | 0                            | 100                           |
| 37            | 3.0            | 0                            | 100                           |
| 38            | 3.0            | 30                           | 70                            |
| 40            | 3.0            | 30                           | 70                            |

**Table S2.** HPLC condition for the analysis and purification of the enzymatic products of **1-Cold** incubated with furin.

| Time (minute) | Flow (mL/min.) | H <sub>2</sub> O % (0.1%TFA) | CH <sub>3</sub> CN % (0.1%TFA) |
|---------------|----------------|------------------------------|--------------------------------|
| 0             | 1.0            | 90                           | 10                             |
| 3             | 1.0            | 90                           | 10                             |
| 55            | 1.0            | 30                           | 70                             |
| 57            | 1.0            | 30                           | 70                             |
| 58            | 1.0            | 90                           | 10                             |
| 60            | 1.0            | 90                           | 10                             |

**Table S3.** HPLC condition for the purification of compound  $^{18}\text{F}$ -SFB and **1**.

| Time (minute) | Flow (mL/min.) | H <sub>2</sub> O % (0.1%TFA) | CH <sub>3</sub> CN% (0.1%TFA) |
|---------------|----------------|------------------------------|-------------------------------|
| 0             | 3.0            | 70                           | 30                            |
| 1             | 3.0            | 70                           | 30                            |
| 35            | 3.0            | 30                           | 70                            |
| 37            | 3.0            | 30                           | 70                            |
| 38            | 3.0            | 70                           | 30                            |
| 40            | 3.0            | 70                           | 30                            |

**Table S4.** Biodistribution of **1** in mice derived from PET quantification (% ID/g, n = 4)

| Organ        | Time (min) | Co-injected with <b>1</b> and <b>1-Cold</b> | Injected with <b>1</b> | Ratio (Co-injected/ <b>1</b> alone) |
|--------------|------------|---------------------------------------------|------------------------|-------------------------------------|
| heart        | 10         | 13.68 ± 6.27                                | 6.14 ± 5.01            | 2.2                                 |
|              | 30         | 7.08 ± 0.16                                 | 1.74 ± 0.00            | 4.0                                 |
|              | 60         | 4.97 ± 2.77                                 | 0.53 ± 0.08            | 9.5                                 |
|              | 120        | 2.09 ± 2.96                                 | 0.00 ± 0.00            |                                     |
|              | 240        | 0.00 ± 0.00                                 | 0.00 ± 0.00            |                                     |
|              | 360        | 0.00 ± 0.00                                 | 0.00 ± 0.00            |                                     |
| liver        | 10         | 15.16 ± 8.37                                | 19.63 ± 7.83           | 0.78                                |
|              | 30         | 12.43 ± 1.74                                | 7.04 ± 1.31            | 1.77                                |
|              | 60         | 6.05 ± 3.15                                 | 1.38 ± 0.13            | 4.40                                |
|              | 120        | 3.17 ± 3.59                                 | 0.38 ± 0.19            | 8.45                                |
|              | 240        | 1.11 ± 1.34                                 | 0.19 ± 0.01            | 5.84                                |
|              | 360        | 0.75 ± 0.87                                 | 0.15 ± 0.02            | 5.14                                |
| kidney       | 10         | 18.13 ± 2.58                                | 18.43 ± 1.30           | 0.98                                |
|              | 30         | 57.88 ± 30.49                               | 13.08 ± 0.88           | 4.43                                |
|              | 60         | 62.00 ± 59.75                               | 3.23 ± 0.33            | 19.20                               |
|              | 120        | 52.11 ± 67.05                               | 1.09 ± 0.84            | 48.03                               |
|              | 240        | 45.45 ± 63.77                               | 0.56 ± 0.55            | 81.89                               |
|              | 360        | 29.80 ± 42.14                               | 0.00 ± 0.00            |                                     |
| gall bladder | 10         | 0.00 ± 0.00                                 | 0.00 ± 0.00            |                                     |
|              | 30         | 14.48 ± 20.47                               | 7.04 ± 9.96            | 2.06                                |
|              | 60         | 28.48 ± 3.39                                | 6.26 ± 2.11            | 4.55                                |
|              | 120        | 29.95 ± 24.95                               | 4.69 ± 0.81            | 6.38                                |
|              | 240        | 20.47 ± 17.13                               | 4.13 ± 0.19            | 4.96                                |
|              | 360        | 15.82 ± 17.52                               | 2.86 ± 0.25            | 5.53                                |
| tumor        | 10         | 2.52 ± 0.95                                 | 1.02 ± 0.19            | 2.46                                |
|              | 30         | 4.08 ± 0.48                                 | 1.12 ± 0.08            | 3.62                                |
|              | 60         | 3.31 ± 1.22                                 | 0.52 ± 0.18            | 6.37                                |
|              | 120        | 2.27 ± 1.86                                 | 0.29 ± 0.02            | 7.95                                |
|              | 240        | 1.55 ± 1.75                                 | 0.19 ± 0.03            | 8.16                                |
|              | 360        | 1.28 ± 1.07                                 | 0.19 ± 0.05            | 6.54                                |

### 3. References

- 1 E. H. White, H. Worthier, H. H. Seliger and W. D. Mcelroy, *J. Am. Chem. Soc.* , 1966, **88**, 2015-2019.
- 2 Y. Gao, Y. Kuang, Z. F. Guo, Z. H. Guo, I. J. Krauss and B. Xu, *J. Am. Chem. Soc.* , 2009, **131**, 13576-13577.
